# Supplementary material for: Determinants and Projections of Minimum Acceptable Diet among Children Aged 6–23 Months: A National and Subnational Inequality Assessment in Bangladesh
Source: MDPI journal article supplement (doi:10.3390/ijerph20032010), 2023-01-21
Supplement: s1 [file s1]

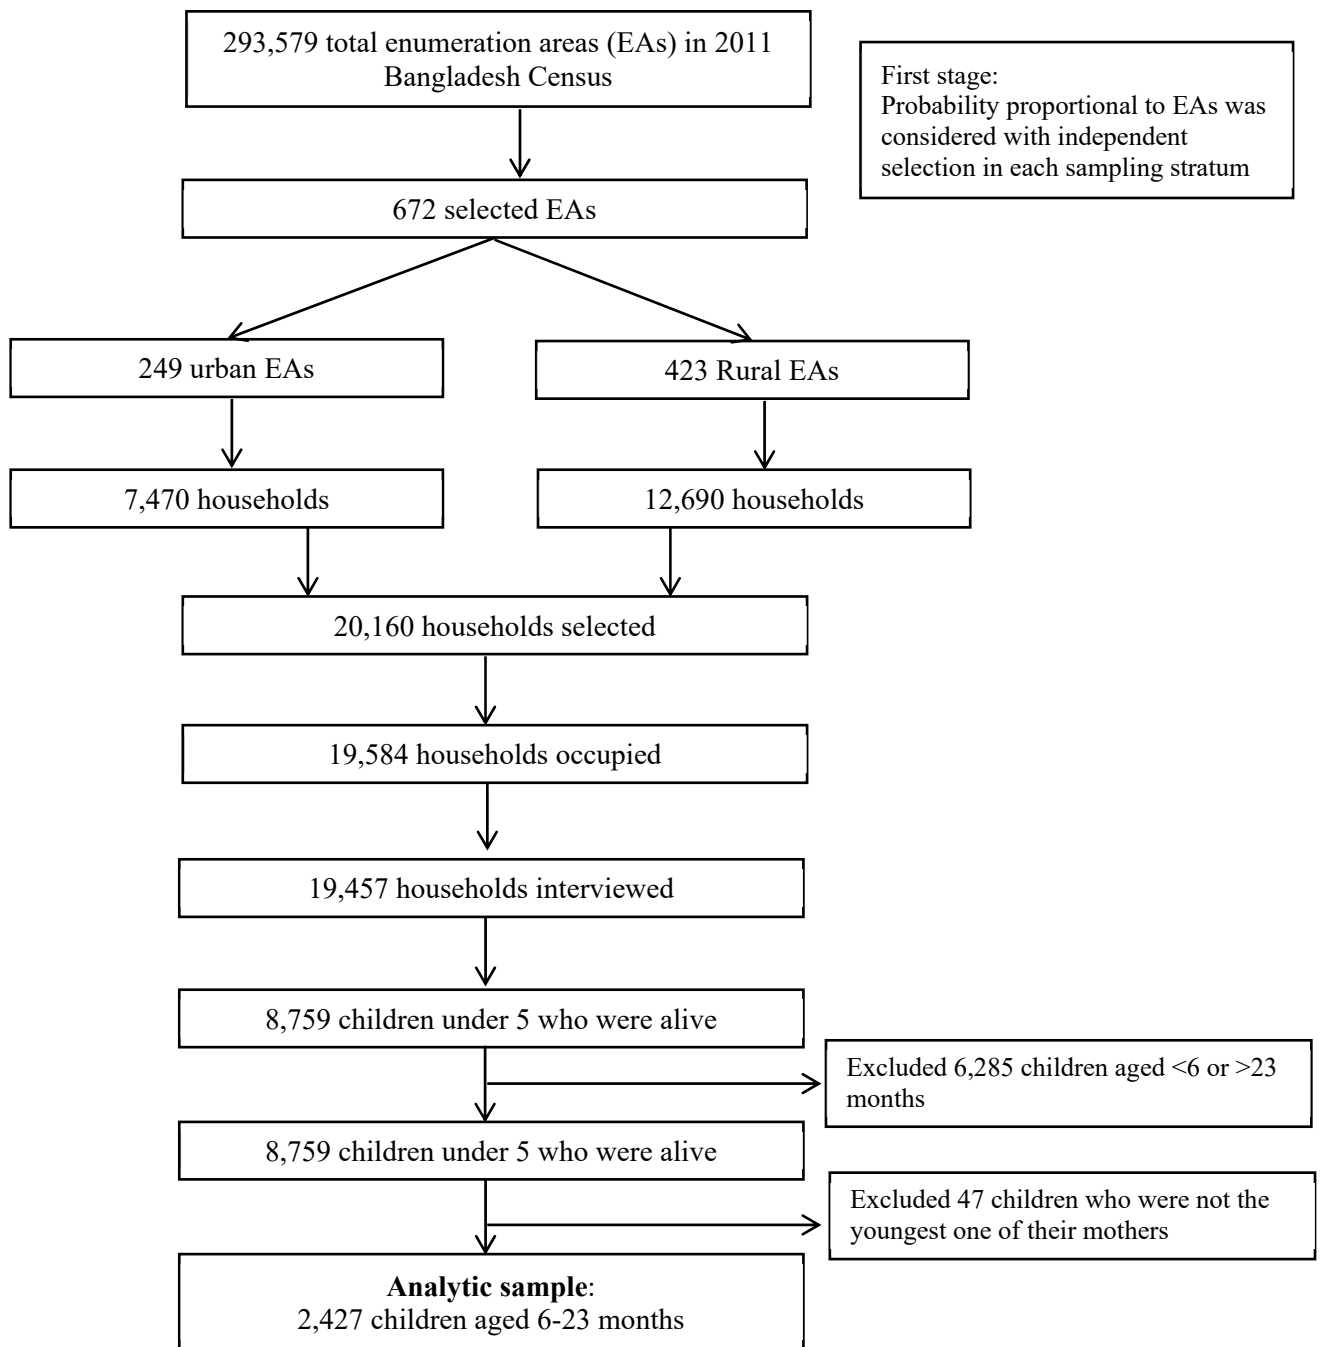

Figure S1: Participant selection.

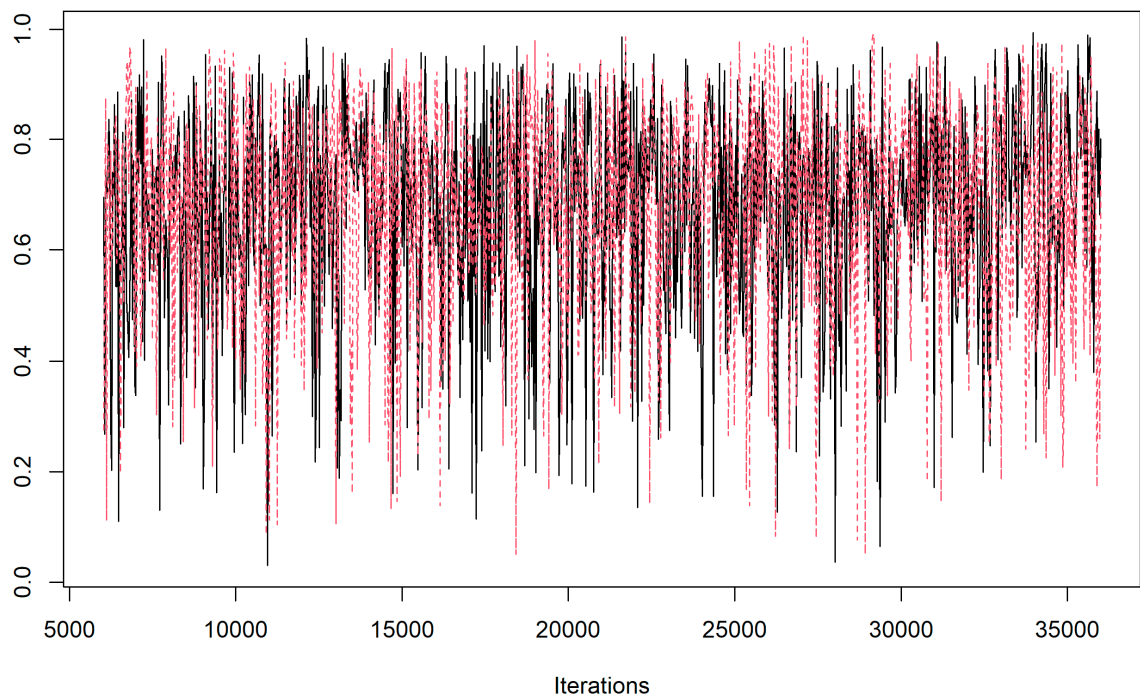

Figure S2: Trace plot for the predicted prevalence of minimum acceptable diet among Bangladeshi children in 2030.

Table S1: Complementary food groups.

| <b>Food group</b>                        | <b>Contains</b>                                                                                                                                             |
|------------------------------------------|-------------------------------------------------------------------------------------------------------------------------------------------------------------|
| Cereal and grains                        | Grains (bread, rice, noodles, porridge or other foods made from grains), white or pale starchy roots, tubers, and plantains                                 |
| Dairy products                           | Cheese, infant formula, milk (powdered or fresh animal milk), yogurt                                                                                        |
| Flesh foods                              | Fish (fresh, dried fish or shellfish), meat (including beef, lamb, goat, chicken or duck), organ meats (including liver, kidney, heart or other organs)     |
| Fruits and vegetables- Rich in Vitamin A | Dark green leafy vegetables; pumpkin, carrots, squash, or sweet potatoes that are yellow or orange inside; ripe mangoes; papayas; and vitamin A-rich fruits |
| Other fruits and vegetables              |                                                                                                                                                             |
| Legumes and nuts                         | Any foods made from beans, nuts, lentils, peas, seeds                                                                                                       |
| Breastmilk                               |                                                                                                                                                             |
| Eggs                                     |                                                                                                                                                             |

Table S2: Prevalence of minimum diet diversity, minimum diet frequency, and minimum acceptable diet among Bangladeshi children aged 6-23 months by household socioeconomic status.

|                    | Prevalence (95% confidence intervals) |                  |                        |                  |                         |                  |
|--------------------|---------------------------------------|------------------|------------------------|------------------|-------------------------|------------------|
|                    | Minimum diet diversity                |                  | Minimum meal frequency |                  | Minimum acceptable diet |                  |
|                    | Poorest quintile                      | Richest quintile | Poorest quintile       | Richest quintile | Poorest quintile        | Richest quintile |
| National           | 26.7 (22.5-31.2)                      | 54.9 (49.5-60.2) | 77.4 (73.6-80.9)       | 86 (81.4-89.6)   | 25.3 (21.3-29.8)        | 49.8 (44.8-54.9) |
| Place of residence |                                       |                  |                        |                  |                         |                  |
| Urban              | 30.5 (19.9-43.7)                      | 55.1 (48.0-62.0) | 78 (68.2-85.4)         | 87.7 (82.5-91.5) | 29.2 (18.9-42.1)        | 49.6 (43.6-55.6) |
| Rural              | 26.2 (21.8-31.1)                      | 54.6 (46.2-62.7) | 77.4 (73.2-81.1)       | 83.2 (73.8-89.7) | 24.8 (20.5-29.7)        | 50.2 (41.1-59.3) |
| Regions            |                                       |                  |                        |                  |                         |                  |
| Barishal           | 18.8 (11.1-30.1)                      | 67.6 (41.4-86.1) | 74.2 (59.8-84.7)       | 89.4 (68.8-97.0) | 18.1 (10.6-29.2)        | 61.9 (35.8-82.6) |
| Chattogram         | 11.7 (6.0-21.7)                       | 53.4 (44.2-62.3) | 66 (54.0-76.3)         | 80.6 (69.6-88.2) | 12.9 (6.8-23.1)         | 48.9 (38.9-59.0) |
| Dhaka              | 37.9 (25.1-52.7)                      | 53.6 (44.1-62.9) | 77.5 (65.3-86.3)       | 84.2 (76.0-90.0) | 37.9 (25.1-52.7)        | 46.1 (37.8-54.7) |
| Khulna             | 28.1 (13.6-49.3)                      | 49.7 (34.1-65.3) | 92.9 (76.3-98.2)       | 94.9 (84.6-98.4) | 28.1 (13.6-49.3)        | 48.5 (32.8-64.4) |
| Mymensingh         | 25.6 (14.4-41.3)                      | 69.3 (43.4-86.9) | 81.5 (73.6-87.5)       | 97.6 (84.2-99.7) | 24.4 (13.6-39.9)        | 66.9 (42.2-84.9) |
| Rajshahi           | 27.9 (16.0-43.9)                      | 50.6 (33.3-67.7) | 71.3 (56.5-82.7)       | 92.3 (73.7-98.1) | 25.2 (13.9-41.2)        | 53.3 (35.8-70.1) |
| Rangpur            | 39.6 (30.5-49.5)                      | 71.4 (49.8-86.3) | 85.8 (76.1-91.9)       | 97.2 (81.2-99.6) | 36.2 (26.9-46.7)        | 71.5 (51.7-85.5) |
| Sylhet             | 19.7 (12.7-29.2)                      | 55.6 (42.2-68.2) | 75.4 (63.3-84.4)       | 90.1 (78.4-95.8) | 16.2 (10.4-24.3)        | 51.2 (38.2-64.2) |

Table S3: Prevalence of minimum diet diversity, minimum diet frequency, and minimum acceptable diet among Bangladeshi children aged 6-23 months by maternal education.

|                       | Prevalence (95% confidence intervals) |                  |                        |                  |                         |                  |
|-----------------------|---------------------------------------|------------------|------------------------|------------------|-------------------------|------------------|
|                       | Minimum diet diversity                |                  | Minimum meal frequency |                  | Minimum acceptable diet |                  |
|                       | No educated                           | Higher educated  | No educated            | Higher educated  | No educated             | Higher educated  |
| National              | 18.5 (12.7-26.1)                      | 56 (50.7-61.1)   | 74.1 (65.4-81.2)       | 89.4 (85.5-92.3) | 16.3 (11.0-23.3)        | 52.4 (47.3-57.5) |
| Place of residence    |                                       |                  |                        |                  |                         |                  |
| Urban                 | 19.0 (9.0-35.6)                       | 63.9 (55.3-71.6) | 70.6 (52.6-83.8)       | 90.6 (84.9-94.3) | 16.8 (7.8-32.4)         | 58.1 (49.7-66.0) |
| Rural                 | 18.3 (11.8-27.4)                      | 51.8 (45.2-58.3) | 75.4 (65.2-83.3)       | 88.7 (83.2-92.5) | 16.1 (10.2-24.5)        | 49.4 (43.1-55.8) |
| Regions               |                                       |                  |                        |                  |                         |                  |
| Barishal              | 9.6 (1.5-43.0)                        | 34.1 (27.9-41.0) | 54.8 (19.9-85.6)       | 76.5 (69.6-82.2) | 9.6 (1.5-43.0)          | 46.6 (32.4-61.3) |
| Chattogram            | 19.3 (7.7-40.4)                       | 37.9 (32.7-43.3) | 76.1 (57.3-88.3)       | 76.3 (71.8-80.2) | 17 (6.8-36.5)           | 53.4 (43.2-63.3) |
| Dhaka                 | 10.6 (3.4-28.7)                       | 40.3 (35.1-45.7) | 69.6 (49.2-84.4)       | 81.6 (76.5-85.8) | 10.6 (3.4-28.7)         | 46 (34.6-57.7)   |
| Khulna                | 16.4 (2.1-64.1)                       | 36.8 (30.8-43.3) | 64.4 (24.0-91.2)       | 87.3 (81.9-91.2) | 16.4 (2.1-64.1)         | 47.8 (32.5-63.4) |
| Mymensingh            | 22.5 (9.7-44.0)                       | 36.7 (29.1-45.0) | 78.8 (53.7-92.3)       | 86.3 (82.5-89.4) | 18 (7.1-38.5)           | 60.8 (43.0-76.1) |
| Rajshahi <sup>a</sup> | NA                                    | 35.5 (29.5-41.9) | 68.1 (34.8-89.6)       | 77.9 (71.3-83.4) | NA                      | 55.9 (40.0-70.6) |
| Rangpur               | 41.4 (19.9-66.8)                      | 47.2 (41.4-53.0) | 100                    | 86 (80.4-90.2)   | 41.4 (19.9-66.8)        | 63.4 (50.7-74.5) |
| Sylhet                | 29.9 (15.4-50.1)                      | 31.6 (26.2-37.5) | 73.5 (55.8-85.9)       | 78.1 (71.8-83.3) | 20.2 (10.5-35.2)        | 57.8 (43.0-71.3) |

Note: <sup>a</sup>The number of samples in non-educated mother category for minimum diet diversity and minimum acceptable diet was insufficient to perform inequality analysis.

Table S4: Proportion of children consumed different food groups by household socioeconomic status and inequality assessment at the national level.

| Food groups                 | Prevalence (95% CI) |                  |                  | Socioeconomic inequality |                       |
|-----------------------------|---------------------|------------------|------------------|--------------------------|-----------------------|
|                             | National            | Poorest quintile | Richest quintile | SII (95% CI)             | RII (95% CI)          |
| Breastmilk                  | 93.8 (92.6-94.9)    | 97.6 (95.8-98.6) | 87.5 (83.4-90.7) | -12.0 (-16.4 to -7.6)*** | 0.88 (0.83 - 0.92)*** |
| Cereal and grains           | 89.5 (88.0-90.8)    | 89.3 (86.1-91.9) | 93.1 (90.0-95.2) | 3.0 (-1.6 to 7.6)        | 1.03 (0.98 - 1.09)    |
| Legumes and nuts            | 22.5 (20.6-24.5)    | 19.8 (16.3-23.8) | 32.1 (27.5-37.2) | 13.6 (7.0 to 20.2)***    | 1.82 (1.29 - 2.35)*** |
| Dairy products              | 32.1 (29.9-34.5)    | 19.3 (15.5-23.7) | 46.2 (40.7-51.8) | 29.9 (22.5 to 37.3)***   | 2.59 (1.95 - 3.24)*** |
| Flesh foods <sup>1</sup>    | 55.4 (53.2-57.6)    | 55.8 (51.2-60.4) | 57.4 (52.1-62.5) | 2.8 (-5.0 to 10.6)       | 1.05 (0.90 - 1.20)    |
| Eggs                        | 41.7 (39.4-44.0)    | 30.4 (26.1-35.1) | 56.7 (50.9-62.4) | 26.7 (18.9 to 34.4)***   | 1.92 (1.54 - 2.30)*** |
| Fruits and vegetables       |                     |                  |                  |                          |                       |
| Rich in Vitamin A           | 39.1 (36.8-41.6)    | 36.1 (31.6-40.8) | 47.5 (42.3-52.8) | 9.0 (1.1 to 16.9)*       | 1.26 (1.00 - 1.51)    |
| Other fruits and vegetables | 28.1 (25.9-30.3)    | 19.5 (15.9-23.8) | 34.9 (29.5-40.8) | 16.7 (9.1 to 24.3)***    | 1.81 (1.32 - 2.30)*** |

Note: <sup>1</sup>Flesh food includes meat, poultry, fish, and shellfish (and organ meats);  
CI, Confidence intervals; SII, Slope index of inequality; RII, relative index of inequality.

Table S5: Proportion of children consumed different food groups by maternal education and inequality assessment at the national level.

| Food groups                 | Prevalence (95% CI) |                  |                  | Socioeconomic inequality |                       |
|-----------------------------|---------------------|------------------|------------------|--------------------------|-----------------------|
|                             | National            | No educated      | Higher educated  | SII (95% CI)             | RII (95% CI)          |
| Breastmilk                  | 93.8 (92.6-94.9)    | 95.8 (90.9-98.1) | 91.9 (88.5-94.4) | -3.2 (-7.0 to 0.6)       | 0.97 (0.93 - 1.01)    |
| Cereal and grains           | 89.5 (88.0-90.8)    | 88.6 (80.6-93.6) | 93.7 (90.7-95.8) | 6.5 (1.3 to 11.6)*       | 1.08 (1.01 - 1.14)*** |
| Legumes and nuts            | 22.5 (20.6-24.5)    | 16.7 (11.1-24.3) | 26.3 (22.1-31.0) | 9.0 (2.4 to 15.5)**      | 1.48 (1.05 - 1.90)*** |
| Dairy products              | 32.1 (29.9-34.5)    | 19.6 (13.4-27.6) | 45.9 (40.8-51.1) | 27.1 (19.4 to 34.9)***   | 2.36 (1.74 - 2.98)*** |
| Flesh foods <sup>1</sup>    | 55.4 (53.2-57.6)    | 35.2 (26.9-44.6) | 61.6 (56.0-66.9) | 15.8 (7.4 to 24.2)***    | 1.34 (1.13 - 1.54)*** |
| Eggs                        | 41.7 (39.4-44.0)    | 23.7 (17.0-32.1) | 56.6 (51.1-61.9) | 28.6 (20.5 to 36.6)***   | 2.02 (1.60 - 2.44)*** |
| Fruits and vegetables       |                     |                  |                  |                          |                       |
| Rich in Vitamin A           | 39.1 (36.8-41.6)    | 28.8 (21.3-37.8) | 50 (45.2-54.9)   | 17.2 (9.5 to 24.8)***    | 1.55 (1.24 - 1.87)*** |
| Other fruits and vegetables | 28.1 (25.9-30.3)    | 24 (16.9-33.0)   | 37.9 (33.0-43.0) | 20.1 (12.4 to 27.8)***   | 2.05 (1.46 - 2.64)*** |

Note: <sup>1</sup>Flesh food includes meat, poultry, fish, and shellfish (and organ meats);  
CI, Confidence intervals; SII, Slope index of inequality; RII, relative index of inequality.

Table S6: Socioeconomic and education-based relative inequality in minimum diet diversity, minimum diet frequency and minimum acceptable diet among Bangladeshi children aged 6-23 months.

| Relative index of inequality | Socioeconomic inequality |                        |                         | Education-based inequality |                        |                         |
|------------------------------|--------------------------|------------------------|-------------------------|----------------------------|------------------------|-------------------------|
|                              | Minimum diet diversity   | Minimum meal frequency | Minimum acceptable diet | Minimum diet diversity     | Minimum meal frequency | Minimum acceptable diet |
| National                     | 2.22 (1.75-2.70)***      | 1.11 (1.03-1.20)***    | 2.10 (1.64-2.56)***     | 2.53 (1.93-3.13)***        | 1.18 (1.08 - 1.28)***  | 2.53 (1.90-3.16)***     |
| Place of residence           |                          |                        |                         |                            |                        |                         |
| Urban                        | 2.41 (1.55-3.26)***      | 1.24 (1.07-1.41)***    | 2.26 (1.42-3.09)***     | 2.74 (1.77-3.70)***        | 1.21 (1.01-1.40)***    | 3.10 (1.91-4.29)***     |
| Rural                        | 2.06 (1.52-2.60)***      | 1.07 (0.97-1.18)       | 2.04 (1.47-2.60)***     | 2.32 (1.63-3.00)***        | 1.17 (1.05-1.29)***    | 2.26 (1.56-2.96)***     |
| Regions                      |                          |                        |                         |                            |                        |                         |
| Barishal                     | 3.09 (0.82-5.36)         | 1.11 (0.83-1.40)       | 3.15 (0.77-5.53)        | 3.36 (1.27-5.45)**         | 1.26 (0.91-1.61)       | 3.77 (1.19-6.35)**      |
| Chattogram                   | 3.76 (1.75-5.76)***      | 1.28 (1.05-1.52)***    | 3.79 (1.60-5.98)*       | 1.92 (0.82-3.01)           | 1.09 (0.88-1.30)       | 2.28 (0.92-3.63)        |
| Dhaka                        | 1.87 (1.01-2.74)***      | 1.07 (0.90-1.23)       | 1.46 (0.78-2.14)        | 2.34 (1.21-3.48)***        | 1.31 (1.03-1.59)***    | 2.12 (1.01-3.23)***     |
| Khulna                       | 2.19 (0.99-3.39)         | 1.05 (0.88-1.21)       | 2.27 (0.99-3.56)        | 2.79 (1.01-4.58)**         | 1.14 (0.95-1.34)       | 2.71 (0.93-4.48)        |
| Mymensingh                   | 2.56 (0.94-4.18)         | 1.16 (1.00-1.32)       | 2.58 (0.96-4.20)        | 2.97 (1.08-4.86)**         | 1.19 (1.01-1.37)***    | 3.00 (1.08-4.91)**      |
| Rajshahi <sup>a</sup>        | 2.31 (0.92-3.69)         | 1.35 (1.04-1.67)***    | 2.73 (1.06-4.40)**      | NA                         | 1.45 (1.04-1.85)***    | NA                      |
| Rangpur                      | 1.66 (0.93-2.39)         | 1.13 (0.95-1.31)       | 1.89 (1.02-2.75)***     | 2.45 (1.24-3.67)***        | 0.94 (0.80-1.08)       | 2.22 (1.13-3.31)***     |
| Sylhet                       | 4.03 (1.70-6.37)**       | 1.20 (0.95-1.45)       | 3.84 (1.51-6.18)**      | 5.28 (2.09-8.46)**         | 1.09 (0.89-1.28)       | 5.23 (1.79-8.67)**      |

Note: \*\*\*p<0.001; \*\*p<0.01; \*p<0.05

<sup>a</sup>The number of samples in non-educated mother category for minimum diet diversity and minimum acceptable diet was insufficient to perform inequality analysis.



Table S7: Determinants of minimum acceptable diet among Bangladeshi children 6-23 months (mixed-effects models).

| Characteristics                 | Odds ratio (95% confidence intervals) |                                  |                         |                         |
|---------------------------------|---------------------------------------|----------------------------------|-------------------------|-------------------------|
|                                 | Fixed-effect<br>crude model           | Mixed-effects model <sup>a</sup> |                         |                         |
|                                 | Model 1 <sup>b</sup>                  | Model 2 <sup>c</sup>             | Model 3 <sup>d</sup>    | Model 4 <sup>e</sup>    |
| <i>Child characteristics</i>    |                                       |                                  |                         |                         |
| Age group (months)              |                                       |                                  |                         |                         |
| 6-11 (ref.)                     | 1.00                                  | 1.00                             | 1.00                    |                         |
| 12-17                           | <b>2.42 (1.96-3.00)</b>               | <b>2.65 (1.85-3.78)</b>          | <b>2.73 (1.89-3.96)</b> | <b>2.78 (1.90-4.05)</b> |
| 18-23                           | <b>2.56 (2.06-3.17)</b>               | <b>2.85 (1.94-4.18)</b>          | <b>2.98 (2.00-4.42)</b> | <b>3.00 (2.01-4.50)</b> |
| Sex                             |                                       |                                  |                         |                         |
| Boys (ref.)                     | 1.00                                  | 1.00                             | 1.00                    |                         |
| Girls                           | 1.08 (0.91-1.27)                      | 1.08 (0.89-1.31)                 | 1.09 (0.89-1.32)        | 1.09 (0.90-1.33)        |
| Order of birth                  |                                       |                                  |                         |                         |
| First                           | <b>1.28 (1.06-1.56)</b>               | 1.12 (0.87-1.44)                 | 1.14 (0.88-1.48)        | 1.15 (0.88-1.50)        |
| Second (ref.)                   | 1.00                                  | 1.00                             | 1.00                    |                         |
| Third or higher                 | 0.85 (0.69-1.06)                      | 1.04 (0.80-1.34)                 | 1.05 (0.80-1.37)        | 1.05 (0.80-1.37)        |
| Underweight                     |                                       |                                  |                         |                         |
| No (ref.)                       | 1.00                                  | 1.00                             | 1.00                    |                         |
| Yes                             | 0.84 (0.67-1.04)                      | 1.06 (0.82-1.36)                 | 1.09 (0.84-1.42)        | 1.09 (0.83-1.42)        |
| <i>Mother's characteristics</i> |                                       |                                  |                         |                         |
| Mother's age (years)            |                                       |                                  |                         |                         |
| 15-20 (<20) (ref.)              | 1.00                                  | 1.00                             | 1.00                    |                         |
| 20-35                           | 1.07 (0.86-1.33)                      | 1.02 (0.77-1.35)                 | 0.98 (0.73-1.32)        | 0.99 (0.74-1.34)        |
| 35-49 (≥35)                     | 1.12 (0.77-1.64)                      | 1.27 (0.76-2.11)                 | 1.21 (0.72-2.06)        | 1.22 (0.71-2.08)        |
| Mother's educational status     |                                       |                                  |                         |                         |
| Not educated (ref.)             | 1.00                                  | 1.00                             | 1.00                    |                         |
| Primary educated                | <b>1.68 (1.06-2.65)</b>               | 1.57 (0.94-2.61)                 | 1.58 (0.93-2.67)        | 1.59 (0.93-2.70)        |
| Secondary educated              | <b>2.60 (1.67-4.04)</b>               | <b>2.32 (1.36-3.98)</b>          | <b>2.25 (1.30-3.90)</b> | <b>2.23 (1.28-3.88)</b> |
| Higher educated                 | <b>5.70 (3.58-9.05)</b>               | <b>4.49 (2.29-8.80)</b>          | <b>4.02 (2.06-7.84)</b> | <b>3.87 (1.97-7.60)</b> |
| Mother's working status         |                                       |                                  |                         |                         |
| Not working (ref.)              | 1.00                                  | 1.00                             | 1.00                    |                         |
| Currently working               | 1.10 (0.92-1.30)                      | <b>1.31 (1.06-1.61)</b>          | <b>1.41 (1.12-1.77)</b> | <b>1.35 (1.07-1.71)</b> |
| Access to mass-media            |                                       |                                  |                         |                         |
| Not at all (ref.)               | 1.00                                  | 1.00                             | 1.00                    |                         |
| Yes (at least to some extent)   | <b>1.86 (1.55-2.22)</b>               | <b>1.34 (1.07-1.68)</b>          | 1.23 (0.97-1.57)        | 1.22 (0.95-1.56)        |
| Number of ANC visit             |                                       |                                  |                         |                         |
| No ANC visit (ref.)             | 1.00                                  | 1.00                             | 1.00                    |                         |
| 1-3 visits                      | <b>1.88 (1.27-2.78)</b>               | <b>1.57 (1.01-2.44)</b>          | <b>1.54 (0.98-2.43)</b> | 1.49 (0.94-2.36)        |
| 4+ visits                       | <b>4.03 (2.73-5.94)</b>               | <b>2.80 (1.68-4.68)</b>          | <b>2.67 (1.59-4.51)</b> | <b>2.51 (1.49-4.23)</b> |
| <i>Household level</i>          |                                       |                                  |                         |                         |
| Wealth quintile                 |                                       |                                  |                         |                         |
| Q1 (Poorest) (ref.)             | 1.00                                  |                                  | 1.00                    |                         |
| Q2                              | <b>1.51 (1.15-1.98)</b>               |                                  | <b>1.33 (0.96-1.85)</b> | 1.39 (0.99-1.95)        |
| Q3                              | <b>1.50 (1.13-1.99)</b>               |                                  | <b>1.05 (0.74-1.49)</b> | 1.12 (0.78-1.61)        |
| Q4                              | <b>1.89 (1.44-2.48)</b>               |                                  | <b>1.24 (0.87-1.77)</b> | 1.35 (0.93-1.97)        |
| Q5 (Richest)                    | <b>3.43 (2.62-4.49)</b>               |                                  | <b>1.87 (1.22-2.86)</b> | <b>2.07 (1.29-3.33)</b> |
| <i>Contextual factors</i>       |                                       |                                  |                         |                         |
| Place of residence              |                                       |                                  |                         |                         |

|                                                |                         |             |                         |
|------------------------------------------------|-------------------------|-------------|-------------------------|
| Rural (ref.)                                   | 1.00                    |             |                         |
| Urban                                          | 1.48 (1.25-1.76)        |             | 1.08 (0.85-1.38)        |
| Regions                                        |                         |             |                         |
| Barishal                                       | 0.83 (0.57-1.20)        |             | 1.11 (0.71-1.75)        |
| Chattogram                                     | 0.94 (0.67-1.32)        |             | 1.12 (0.74-1.70)        |
| Dhaka                                          | 1.03 (0.74-1.45)        |             | 1.03 (0.68-1.58)        |
| Khulna (ref.)                                  | 1.00                    |             |                         |
| Mymensingh                                     | 0.93 (0.65-1.33)        |             | 1.27 (0.81-1.97)        |
| Rajshahi                                       | 0.99 (0.69-1.43)        |             | 1.11 (0.71-1.73)        |
| Rangpur                                        | <b>1.51 (1.06-2.15)</b> |             | <b>1.78 (1.12-2.84)</b> |
| Sylhet                                         | 0.79 (0.56-1.11)        |             | <b>1.04 (0.67-1.62)</b> |
| <b>Random-effects parameter: Variance (SE)</b> |                         |             |                         |
| Community level                                | 0.17 (0.11)             | 0.17 (0.11) | 0.15 (0.11)             |
| Household level                                | 0.12 (0.70)             | 0.29 (0.76) | 0.37 (0.79)             |
| <b>Likelihood Ratio test<sup>f</sup></b>       |                         |             |                         |
| Chi-square statistic                           | 4.04                    | 3.99        | 3.03                    |
| P value                                        | 0.1325                  | 0.1359      | 0.2199                  |

Note: SE, standard error.

<sup>a</sup>Mixed-effects model included random intercept and fixed slope.

<sup>b</sup>Model 1, unadjusted model.

<sup>c</sup>Model 2 included only children's characteristics and their mother's characteristics.

<sup>d</sup>Model 3 further included household-level characteristics.

<sup>e</sup>Model 4 additionally included community-level variables (contextual factors)

<sup>f</sup>The likelihood ratio tests were performed to compare fixed effect model with a random-effects model. Based on the results on likelihood ratio tests, estimates of fixed effect logistic regression models were preferred than mixed-effects models. The results of fixed effect logistic regression models are presented in Table 3.

Table S8: Projected prevalence of minimum acceptable diet among Bangladeshi children aged 6-23 months (2020-2030).

|                             | Percentage (95% credible intervals) |                  |                  |                  |
|-----------------------------|-------------------------------------|------------------|------------------|------------------|
|                             | 2020                                | 2022             | 2025             | 2030             |
| National                    | 42.5 (21.6-63.4)                    | 48.3 (22.5-74.1) | 56.6 (21.8-85.6) | 67.9 (21.1-95.6) |
| Wealth-quintile             |                                     |                  |                  |                  |
| Poorest                     | 29.4 (21.8-38.8)                    | 34.9 (24.8-46.5) | 43.9 (30.2-58.7) | 59.1 (39.8-76.3) |
| Poorer                      | 35.9 (26.8-45.3)                    | 41.9 (30.6-53.2) | 51.2 (36.7-65.2) | 65.9 (46.1-80.9) |
| Middle class                | 43.1 (33.1-53.3)                    | 49.3 (37.0-61.2) | 58.5 (43.1-72.5) | 72.1 (53.4-85.7) |
| Richer                      | 48.7 (38.5-58.6)                    | 54.9 (42.8-65.9) | 63.8 (49.0-75.6) | 76.4 (59.7-87.2) |
| Richest                     | 55.9 (46.2-64.9)                    | 61.9 (51.0-72.1) | 70.2 (57.7-81.1) | 81.2 (67.0-90.7) |
| Mother's educational status |                                     |                  |                  |                  |
| Not educated                | 19.6 (8.9-31.8)                     | 22.9 (9.4-38.9)  | 28.4 (9.5-52.5)  | 38.7 (9.7-72.8)  |
| Primary educated            | 30.7 (17.1-48.3)                    | 34.8 (17.0-56.3) | 41.3 (17.7-68.8) | 51.9 (18.7-84.5) |
| Secondary educated          | 36.3 (20.5-56.4)                    | 40.7 (21.1-64.1) | 47.2 (22.1-76.2) | 57.5 (22.2-89.2) |
| Higher educated             | 58.8 (42.0-76.3)                    | 62.9 (42.6-82.6) | 68.5 (42.4-88.9) | 76.1 (43.7-95.2) |

Note: Projections were developed based on summary data from BDHS 2011, BDHS 2014 and BDHS 2017-18. Summarized data on the proportion of MAD in year 2011 and 2014 were obtained from the BDHS reports.
